# Supplementary material
Source: PubMed Central journal article supplement (PMC3640371)
Supplement: supp_djs264_jnci_JNCI_11_1946_s01.pdf [file supp_djs264_jnci_JNCI_11_1946_s01.pdf]

### A. HR+/HER2-

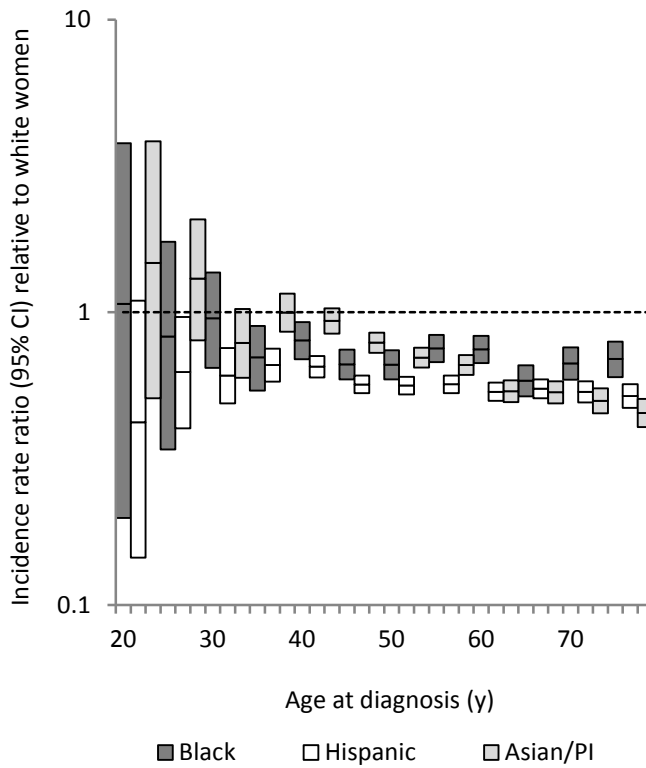

### B. HR+/HER2+

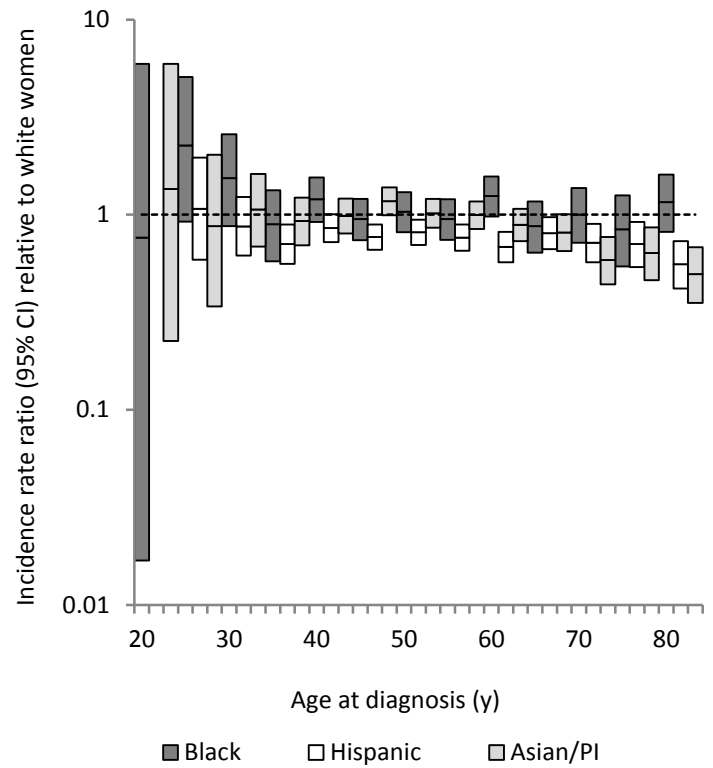

### C. HR-/HER2-

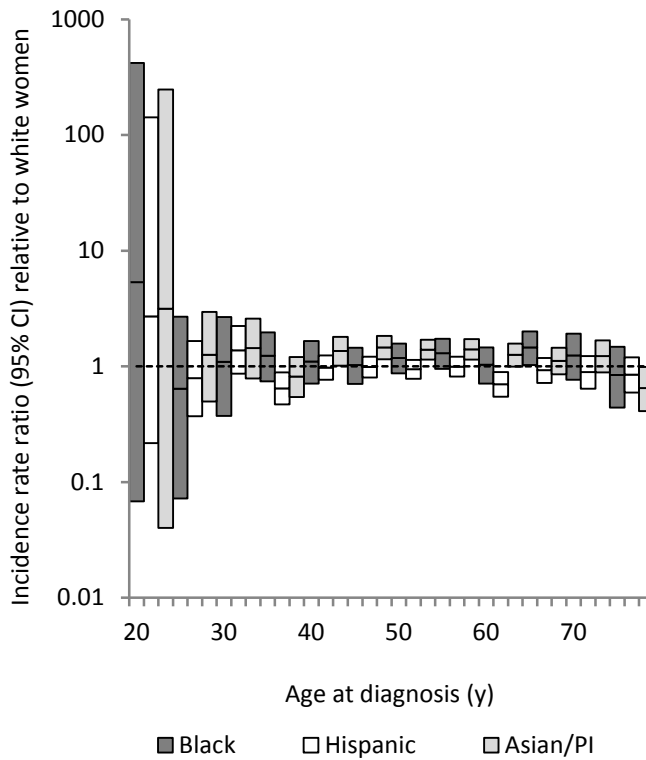

### D. Triple-negative

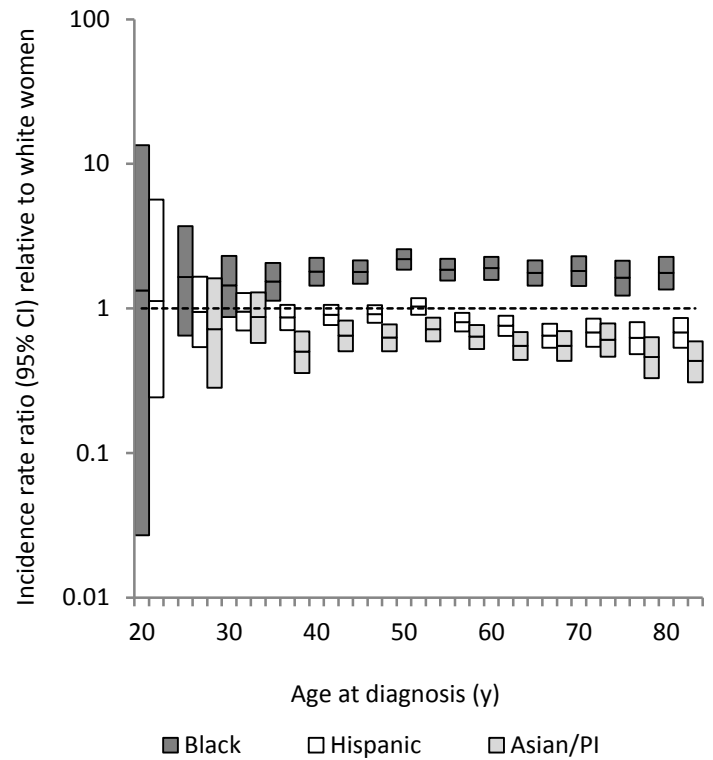

**Supplementary Figure 1.** Rate ratios of incidence of breast cancer subtypes by race and ethnicity at specific ages, relative to white women, California, 2006–2009. Note different axis scales. Point estimate shown by horizontal line, 95% confidence interval (CI) indicated by box extending above and below point estimate. HR+ = hormone receptor positive; HER2- = HER2 negative; HR- = hormone receptor negative; HER2+ = HER2 positive; TNBC = triple-negative breast cancer; PI = Pacific Islander.
